# Supplementary material
Source: Springer Nature journal article supplement (https://www.springermedizin.de/resource/supplementary/13075_2012_4385_MOESM7_ESM.pdf/10110298)
Supplement: MOESM7 [file 10110298]

## Identification of progressors by C1M

Table 3: Multivariate linear regression analysis of all patients in the PBO group, demonstrating that adjusted baseline C1M levels are significantly correlated to radiographic changes after 24 and 52 weeks.

| JSN                                                                       | $\Delta 24$ weeks |        |                |     | $\Delta 52$ weeks |         |                |    |
|---------------------------------------------------------------------------|-------------------|--------|----------------|-----|-------------------|---------|----------------|----|
|                                                                           | $\beta$           | P      | R <sup>2</sup> | n   | $\beta$           | P       | R <sup>2</sup> | n  |
| <b>C1M</b>                                                                | 0.34              | 0.013  | 0.04           | 153 | 1.38              | 0.0015  | 0.11           | 85 |
| <b>C1M adjusted for CRP</b>                                               | 0.74              | 0.0013 | 0.06           | 153 | 3.91              | <0.0001 | 0.27           | 85 |
| <b>C1M adjusted for CRP, age, BMI and Disease duration</b>                | 0.69              | 0.0022 | 0.11           | 151 | 3.60              | <0.0001 | 0.30           | 83 |
| <b>C1M adjusted for CRP, age, BMI, Disease duration and baseline JSN</b>  | 0.68              | 0.0029 | 0.11           | 151 | 3.55              | <0.0001 | 0.31           | 83 |
| <b>mTSS</b>                                                               |                   |        |                |     |                   |         |                |    |
| <b>C1M</b>                                                                | 1.13              | 0.0035 | 0.05           | 153 | 3.40              | 0.0001  | 0.17           | 85 |
| <b>C1M adjusted for CRP</b>                                               | 1.17              | 0.07   | 0.04           | 153 | 7.13              | <0.0001 | 0.25           | 85 |
| <b>C1M adjusted for CRP, age, BMI and Disease duration</b>                | 0.98              | 0.11   | 0.14           | 151 | 6.12              | <0.0001 | 0.32           | 83 |
| <b>C1M adjusted for CRP, age, BMI, Disease duration and baseline mTSS</b> | 0.95              | 0.13   | 0.14           | 151 | 6.04              | <0.0001 | 0.32           | 83 |
| <b>ERN</b>                                                                |                   |        |                |     |                   |         |                |    |
| <b>C1M</b>                                                                | 0.79              | 0.009  | 0.038          | 153 | 2.01              | 0.0002  | 0.15           | 85 |
| <b>C1M adjusted for CRP</b>                                               | 0.43              | 0.39   | 0.037          | 153 | 3.22              | 0.0006  | 0.17           | 85 |
| <b>C1M adjusted for CRP, age, DMI and Disease duration</b>                | 0.29              | 0.56   | 0.12           | 151 | 2.52              | 0.0055  | 0.25           | 83 |
| <b>C1M adjusted for CRP, age, BMI, Disease duration and baseline ERN</b>  | 0.26              | 0.59   | 0.12           | 151 | 2.47              | 0.0066  | 0.25           | 83 |

The regression coefficient,  $\beta$ , *p*-value and R<sup>2</sup> are given. Data were log-transformed before analysis.
